# Supplementary material
Source: PubMed Central journal article supplement (PMC5070919)

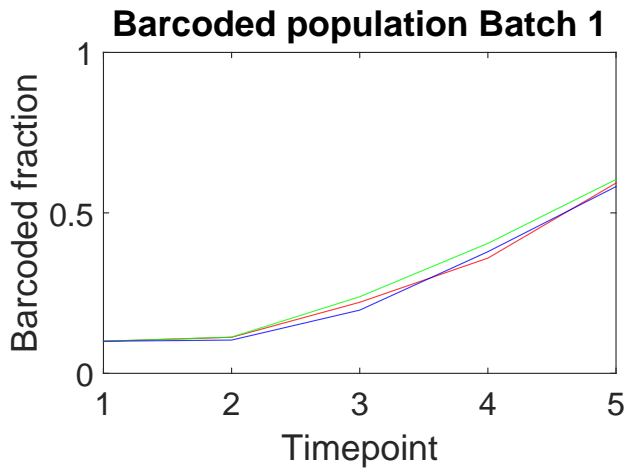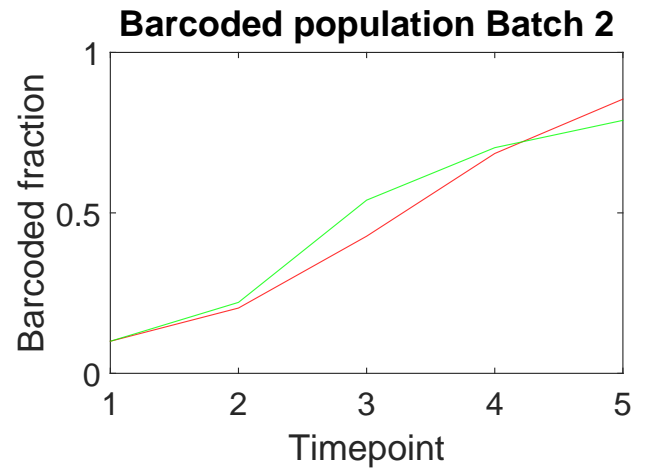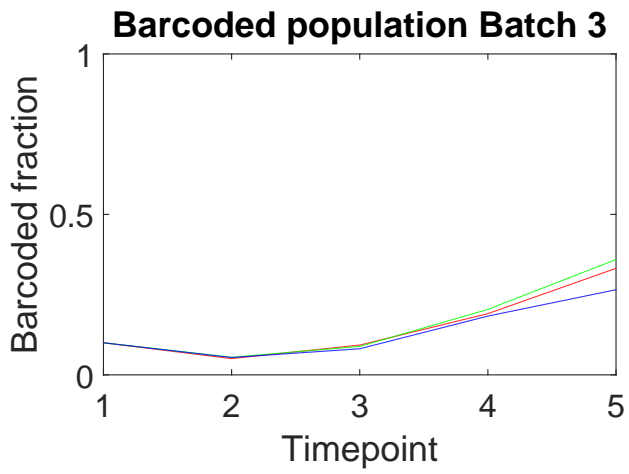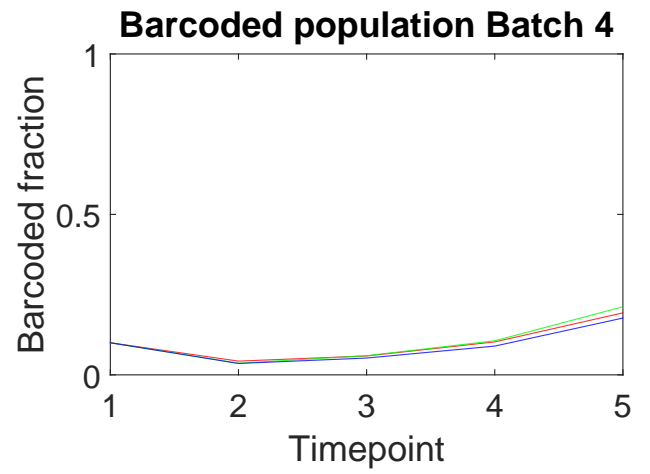

Supplement: NIHMS822440-supplement-Figure_S1.pdf [file NIHMS822440-supplement-Figure_S1.pdf]

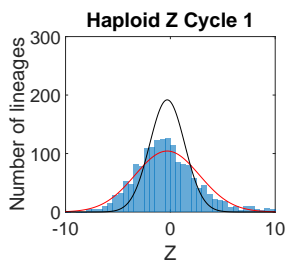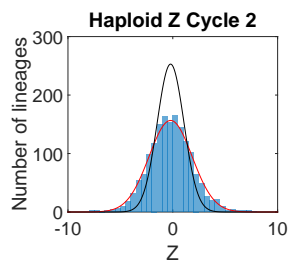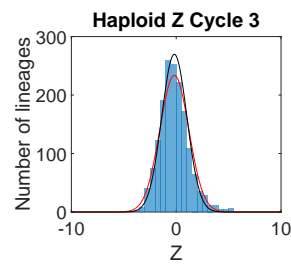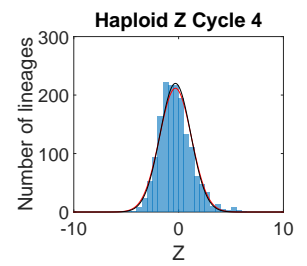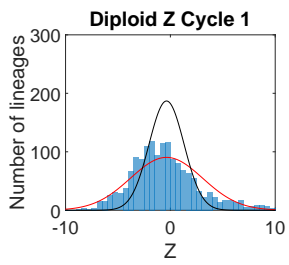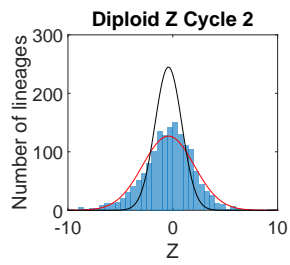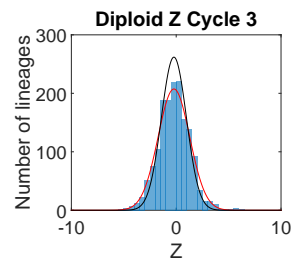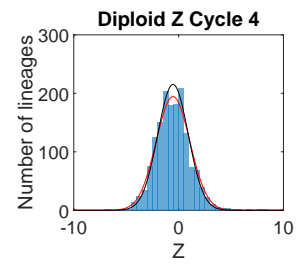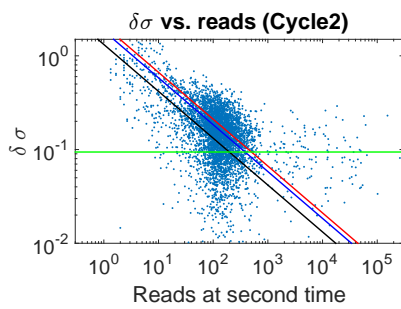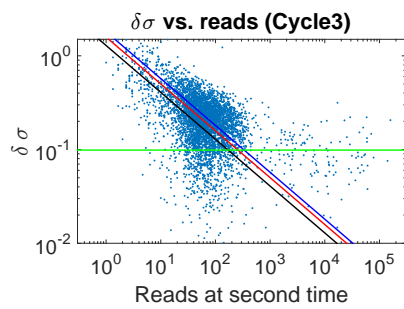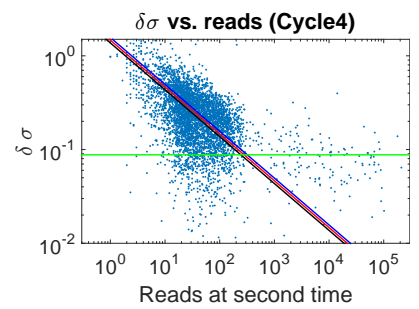

Supplement: NIHMS822440-supplement-Figure_S2.pdf [file NIHMS822440-supplement-Figure_S2.pdf]

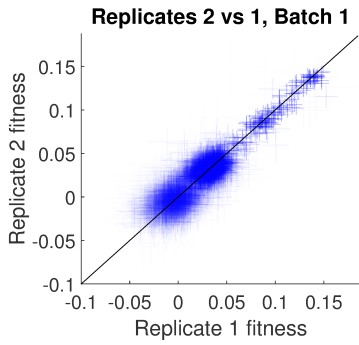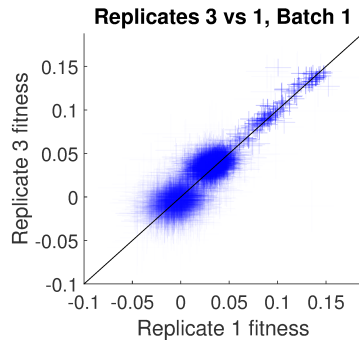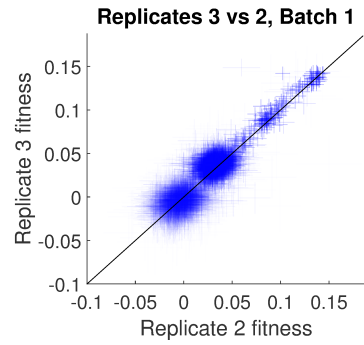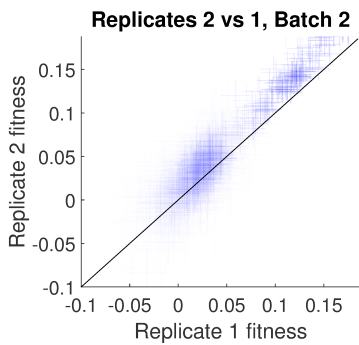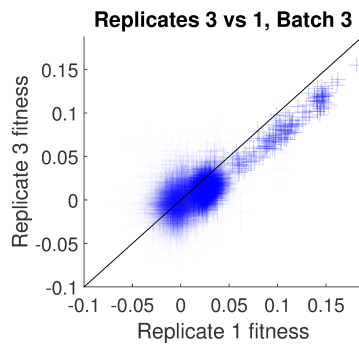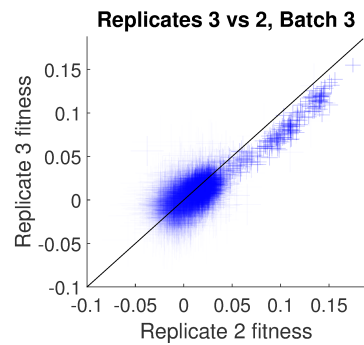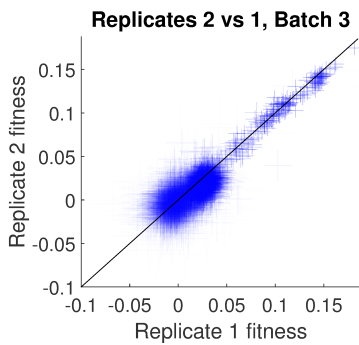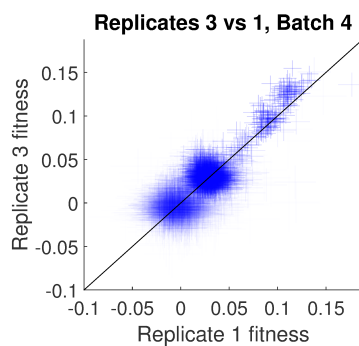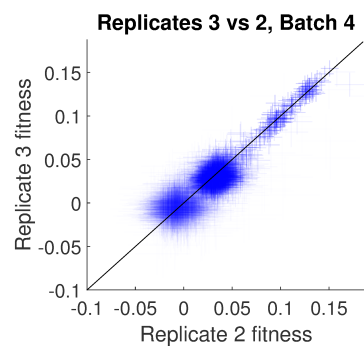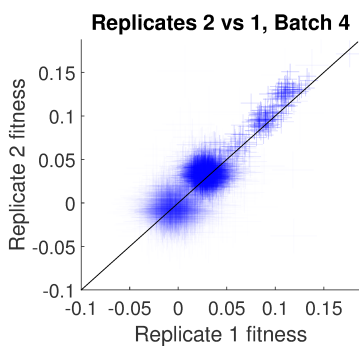

Supplement: NIHMS822440-supplement-Figure_S4.pdf [file NIHMS822440-supplement-Figure_S4.pdf]

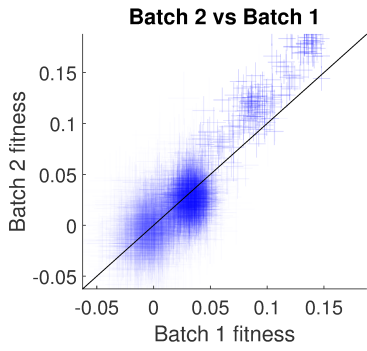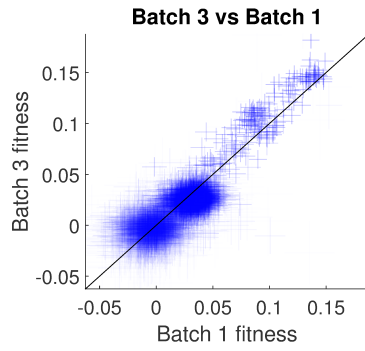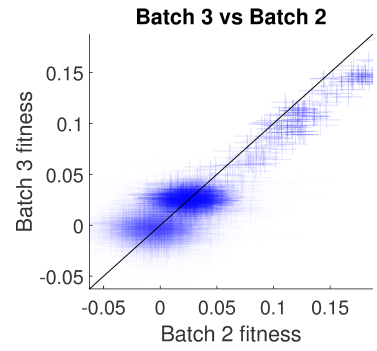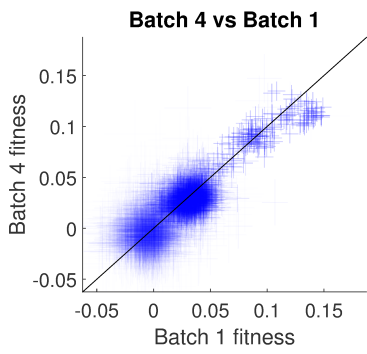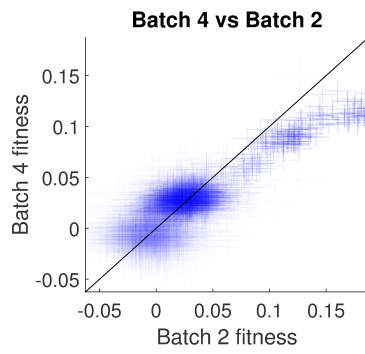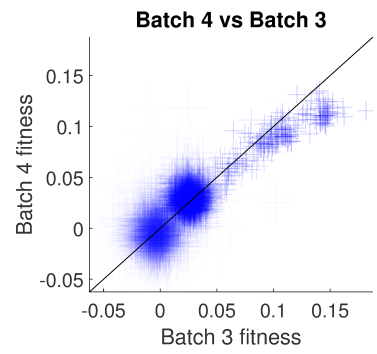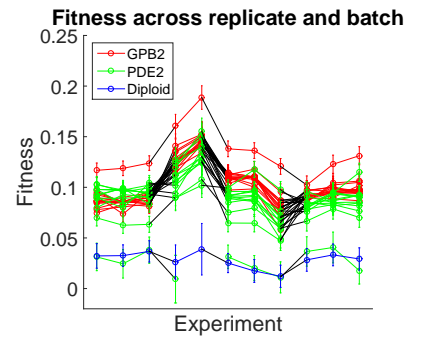

Supplement: NIHMS822440-supplement-Figure_S5.pdf [file NIHMS822440-supplement-Figure_S5.pdf]

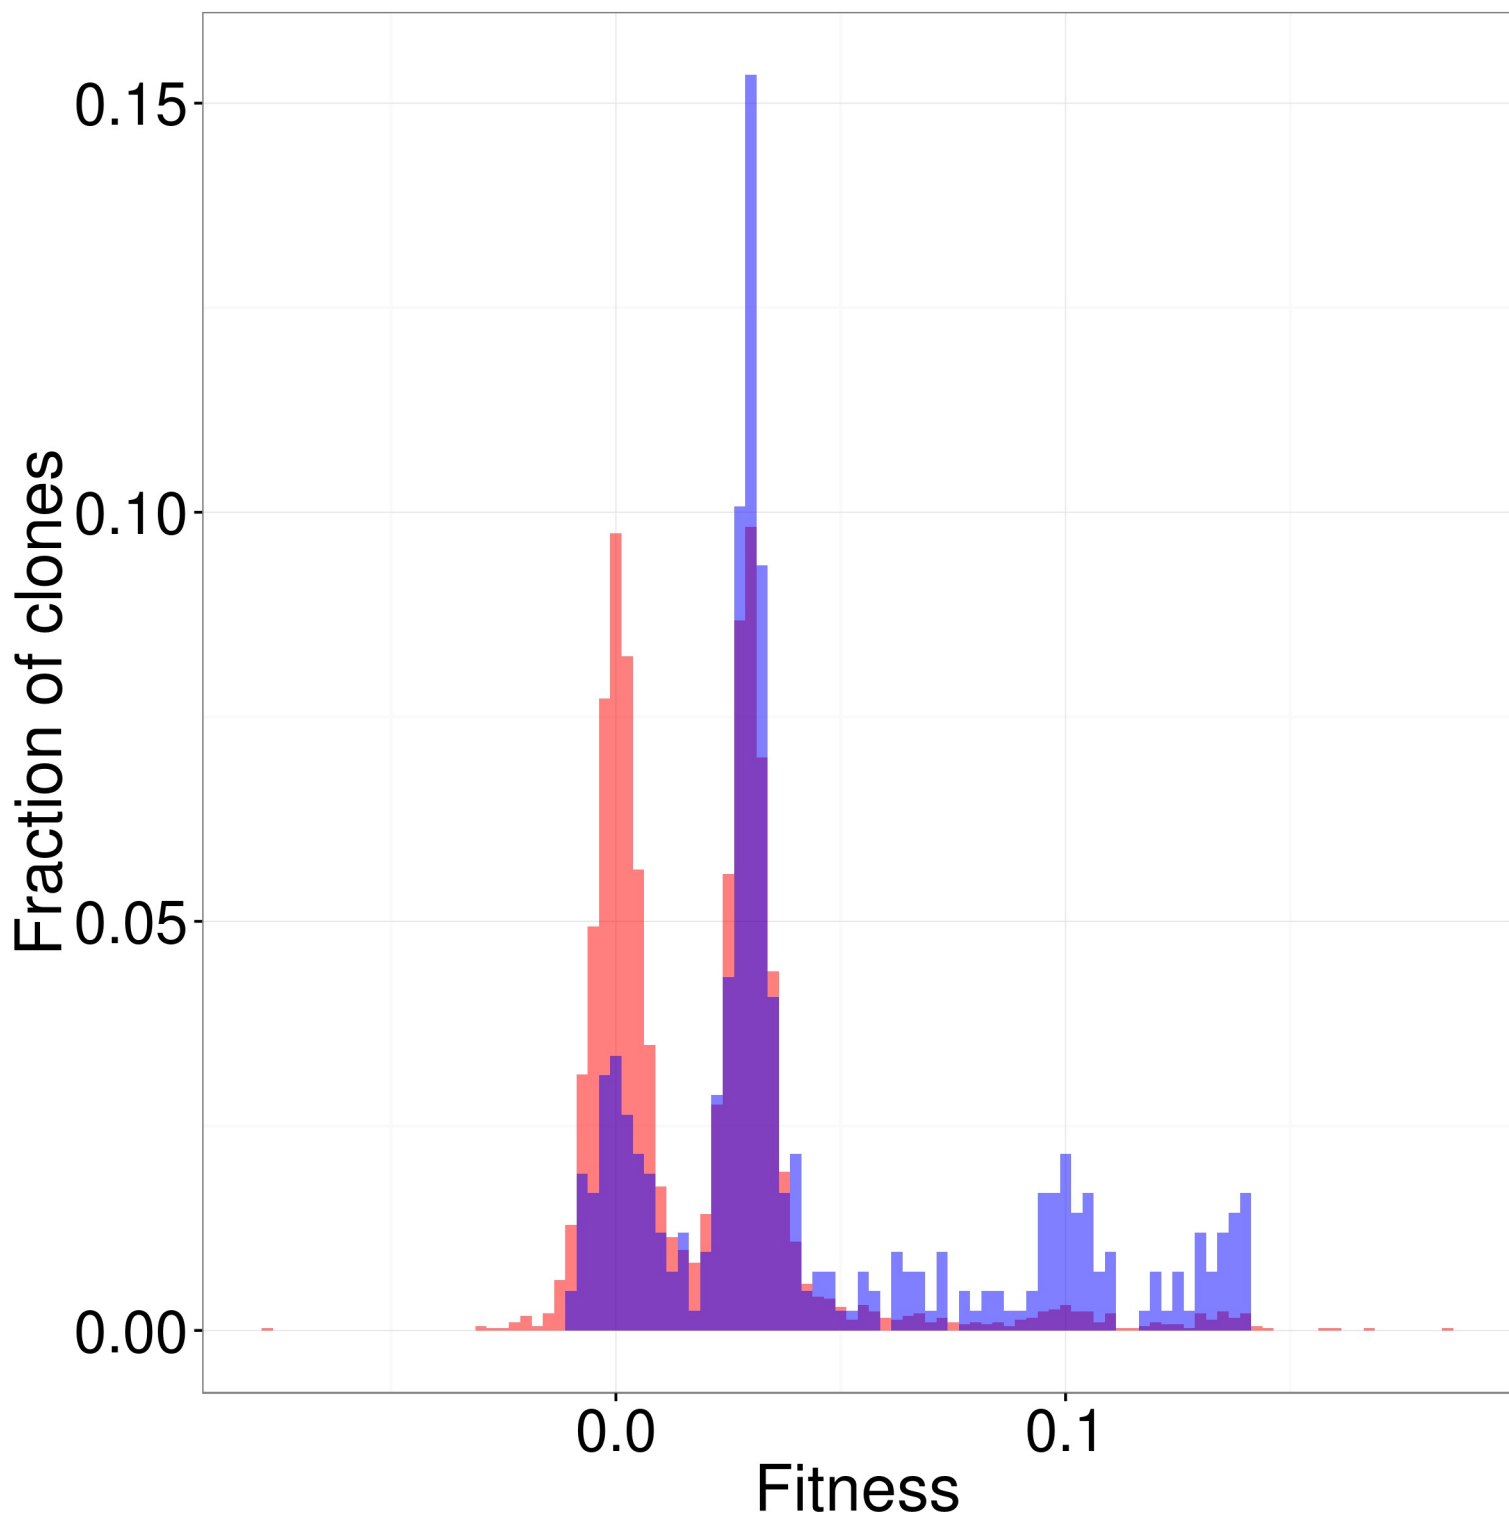

Supplement: NIHMS822440-supplement-Figure_S6.pdf [file NIHMS822440-supplement-Figure_S6.pdf]

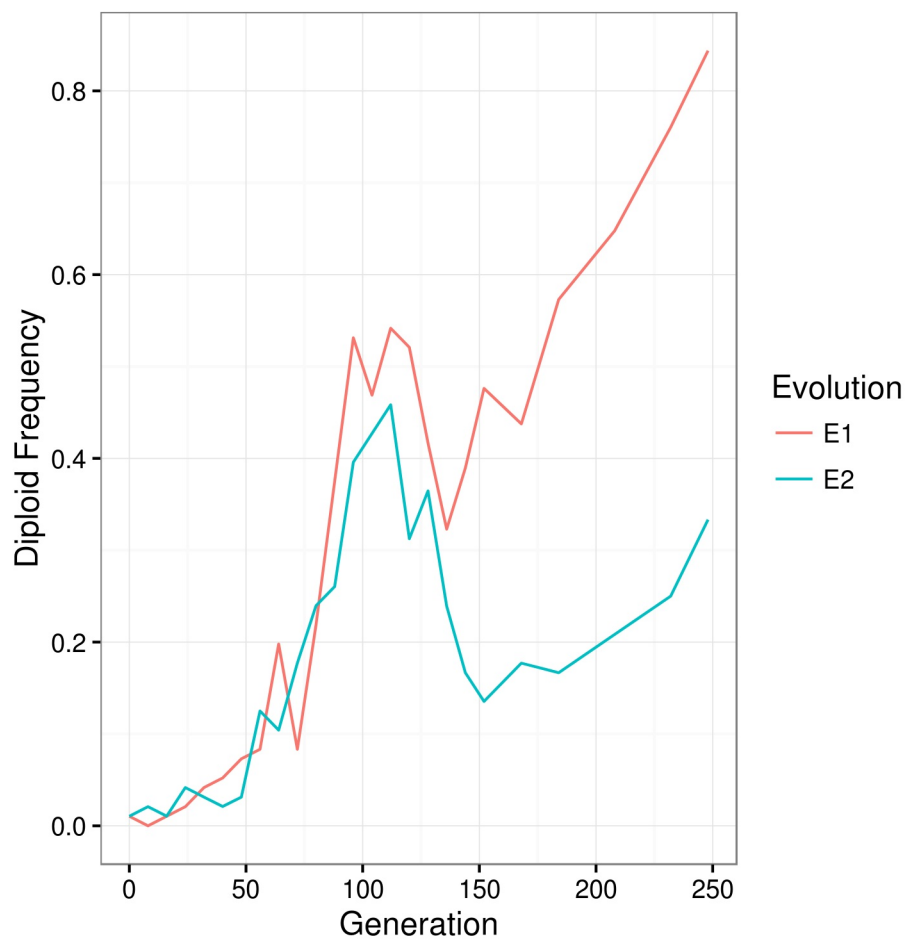

Supplement: NIHMS822440-supplement-Figure_S7.pdf [file NIHMS822440-supplement-Figure_S7.pdf]
